# Supplementary material
Source: PubMed Central journal article supplement (PMC6054303)
Supplement: NIHMS77116-supplement-Supplementary_information.pdf [file NIHMS77116-supplement-Supplementary_information.pdf]

## Supplementary Information

### Sarpagan bridge enzyme has substrate-controlled cyclization and aromatization modes

Thu-Thuy T. Dang<sup>1#</sup>, Jakob Franke<sup>1#</sup>, Inês Carqueijeiro<sup>2</sup>, Chloe Langley<sup>1</sup>, Vincent Courdavault<sup>2</sup>, Sarah E. O'Connor<sup>1</sup>

<sup>#</sup>These authors contributed equally to this work

<sup>1</sup>Department of Biological Chemistry, John Innes Centre, Norwich Research Park, Norwich NR4 7UH, UK

<sup>2</sup>Université François-Rabelais de Tours, EA2106 Biomolécules et Biotechnologies Végétales, Parc de Grandmont, 37200, Tours, France

## Table of Contents

|                                                                                                                                                                     |           |
|---------------------------------------------------------------------------------------------------------------------------------------------------------------------|-----------|
| <b>Supplementary Figures</b> .....                                                                                                                                  | <b>2</b>  |
| <b>Supplementary Figure 1.</b> Sarpagan bridge enzyme and its homologue alstonine synthase.....                                                                     | <b>2</b>  |
| <b>Supplementary Figure 2.</b> Candidate selection based on a self-organizing map.....                                                                              | <b>3</b>  |
| <b>Supplementary Figure 3.</b> NMR spectra of isolated and semisynthetic compounds.....                                                                             | <b>4</b>  |
| <b>Supplementary Figure 4.</b> Virus Induced Gene Silencing of <i>Rauwolfia tetraphylla</i> ortholog of SBE..                                                       | <b>9</b>  |
| <b>Supplementary Figure 5.</b> Unrooted neighbour-joining phylogenetic tree for CYP candidates .....                                                                | <b>10</b> |
| <b>Supplementary Figure 6.</b> Intracellular localization of SBE.....                                                                                               | <b>11</b> |
| <b>Supplementary Figure 7.</b> Western blot showing the expression of RsSBE, GsSBE and CrAS.....                                                                    | <b>12</b> |
| <b>Supplementary Figure 8.</b> Steady-state enzyme kinetics of RsSBE (A), GsSBE (B) and CrAS (C) in total microsomal protein extracts of <i>S. cerevisiae</i> ..... | <b>13</b> |
| <b>Supplementary Figure 9.</b> Relative transcript levels of <i>RsSBE</i> , <i>GsSBE</i> and <i>CrAS</i> in different organs. ....                                  | <b>14</b> |
| <b>Supplementary Figure 10.</b> Substrate specificity of RsSBE, GsSBE and CrAS .....                                                                                | <b>15</b> |
| <b>Supplementary Figure 11.</b> Catalytic activity of recombinant RsSBE, GsSBE and CrAS with additional substrates.....                                             | <b>16</b> |
| <b>Supplementary Figure 12.</b> Homology modeling and mutagenesis of CrAS.....                                                                                      | <b>17</b> |
| <b>Supplementary Tables</b> .....                                                                                                                                   | <b>19</b> |
| <b>Supplementary Table 1.</b> Primers used for the assembly of expression vectors and for RT-PCR .....                                                              | <b>19</b> |
| <b>Supplementary Table 2.</b> <sup>1</sup> H NMR data of isolated and semisynthetic alkaloids used in this study ..                                                 | <b>21</b> |
| <b>Supplementary Table 3.</b> <sup>13</sup> C NMR data of major isolated alkaloids used in this study.....                                                          | <b>22</b> |
| <b>Supplementary Table 4.</b> Chromatographic and spectral data used for the identification and relative quantification of enzymatic products by LC-MS/MS.....      | <b>24</b> |

## Supplementary Figures

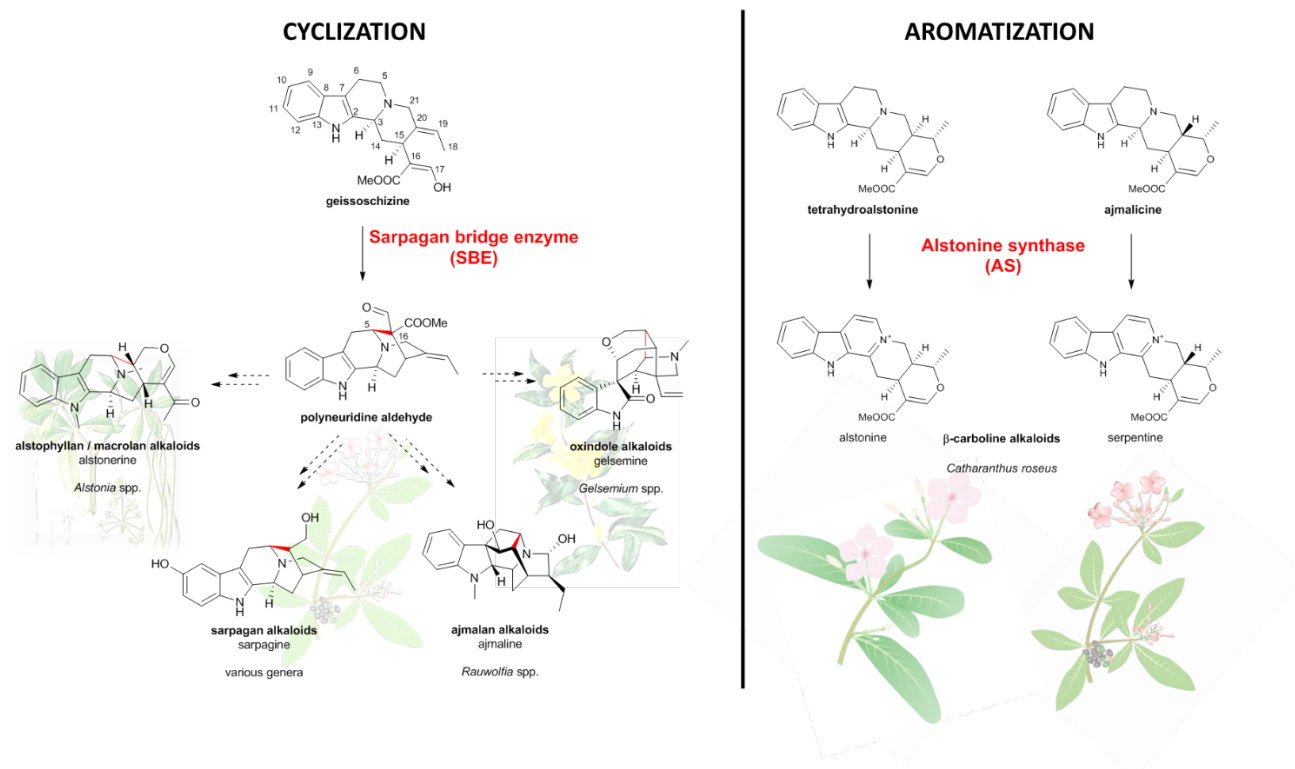

**Supplementary Figure 1. Sarpagan bridge enzyme and its homologue alstonine synthase.** The formation of polyneuridine aldehyde by sarpagan bridge enzyme is a central step in the biosynthetic pathways to a wide variety of monoterpene indole alkaloids scaffolds. In this work, we identify sarpagan bridge enzyme and show that its homologue alstonine synthase catalyzes aromatization to  $\beta$ -carbolines.

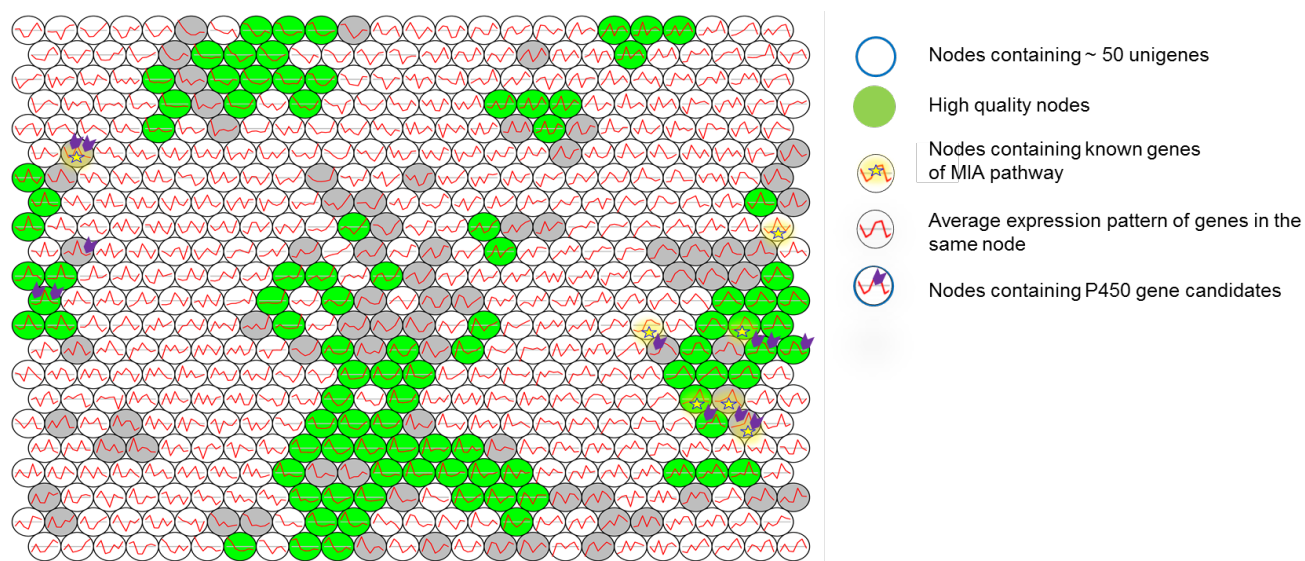

**Supplementary Figure 2.** Candidate selection based on a self-organizing map using *R. serpentina* transcriptomic data. Each node represents approximately 50 unigenes with the most similar expression profile. The reported MIA pathway genes are represented by yellow stars. Purple arrows represent CYP candidates; some nodes contain more than one candidate. Green nodes signify the highest quality nodes, grey and white nodes are of lower quality. See methods for a detailed description of the quality metrics.

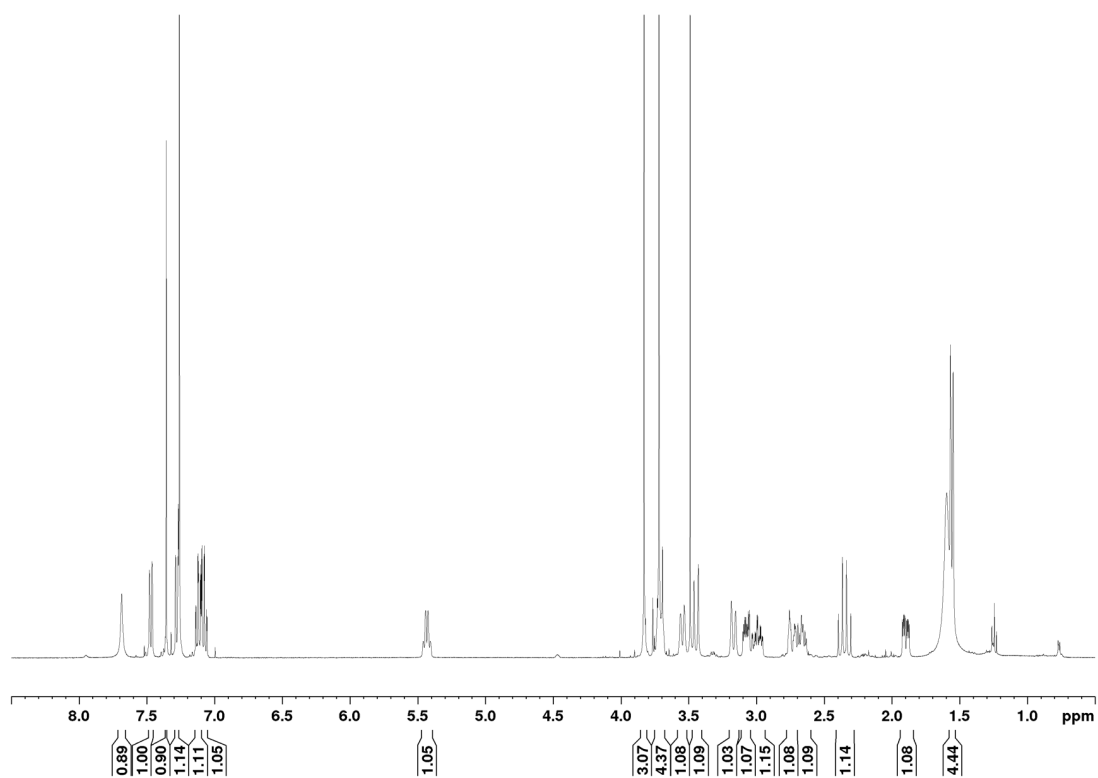

**Supplementary Figure 3a.**  $^1\text{H}$  NMR spectrum of isolated geissoschizine methyl ether ( $\text{CDCl}_3$ , 298 K, 400 MHz). The compound was characterized by NMR when isolated for the first time. A compound with identical retention time, HRMS and MSMS was also obtained from a second batch of plant material.

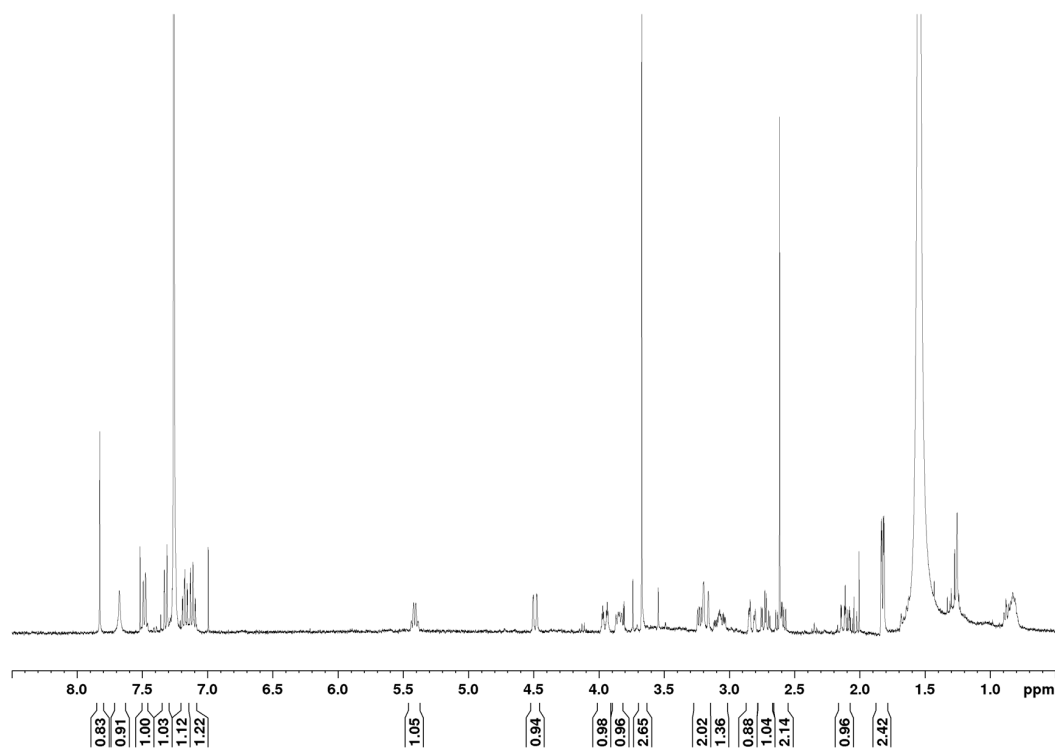

**Supplementary Figure 3b.**  $^1\text{H}$  NMR spectrum of semisynthetic geissoschizine ( $\text{CDCl}_3$ , 298 K, 400 MHz). The compound was characterized by NMR when synthesized for the first time. A compound with identical retention time, HRMS and MSMS was obtained from a second experiment.

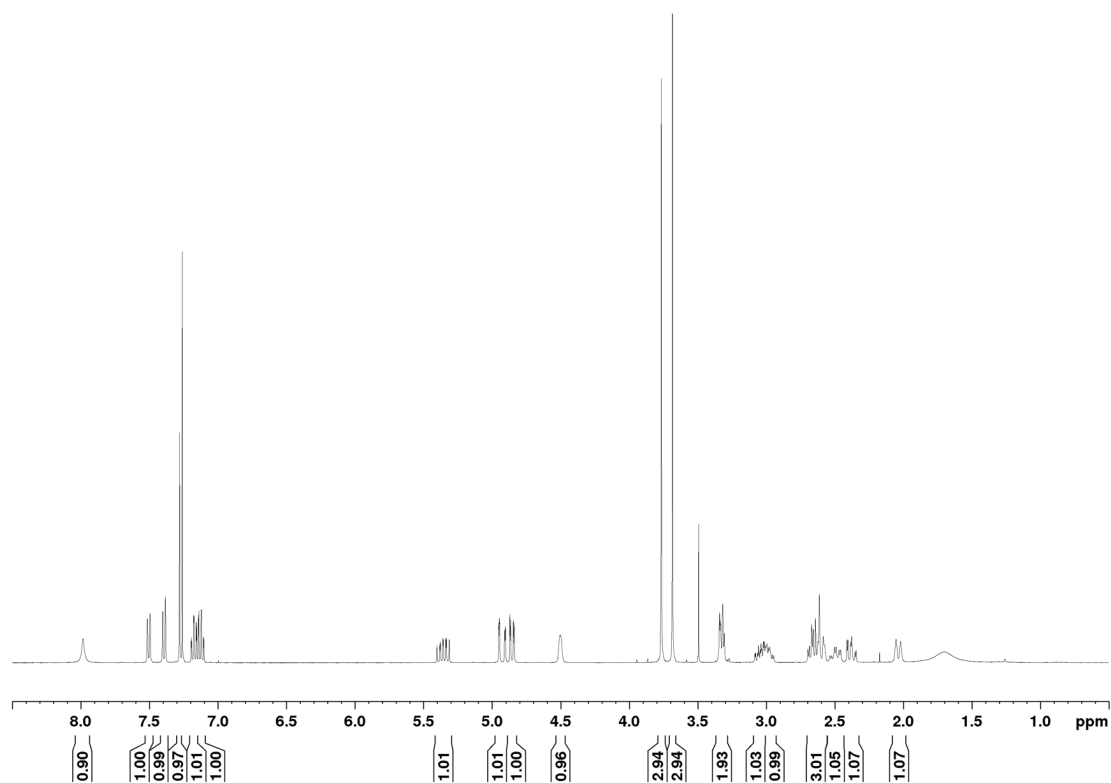

**Supplementary Figure 3c.**  $^1\text{H}$  NMR spectrum of isolated hirsuteine ( $\text{CDCl}_3$ , 298 K, 400 MHz). The compound was characterized by NMR when isolated for the first time. A compound with identical retention time, HRMS and MSMS was also obtained from a second batch of plant material.

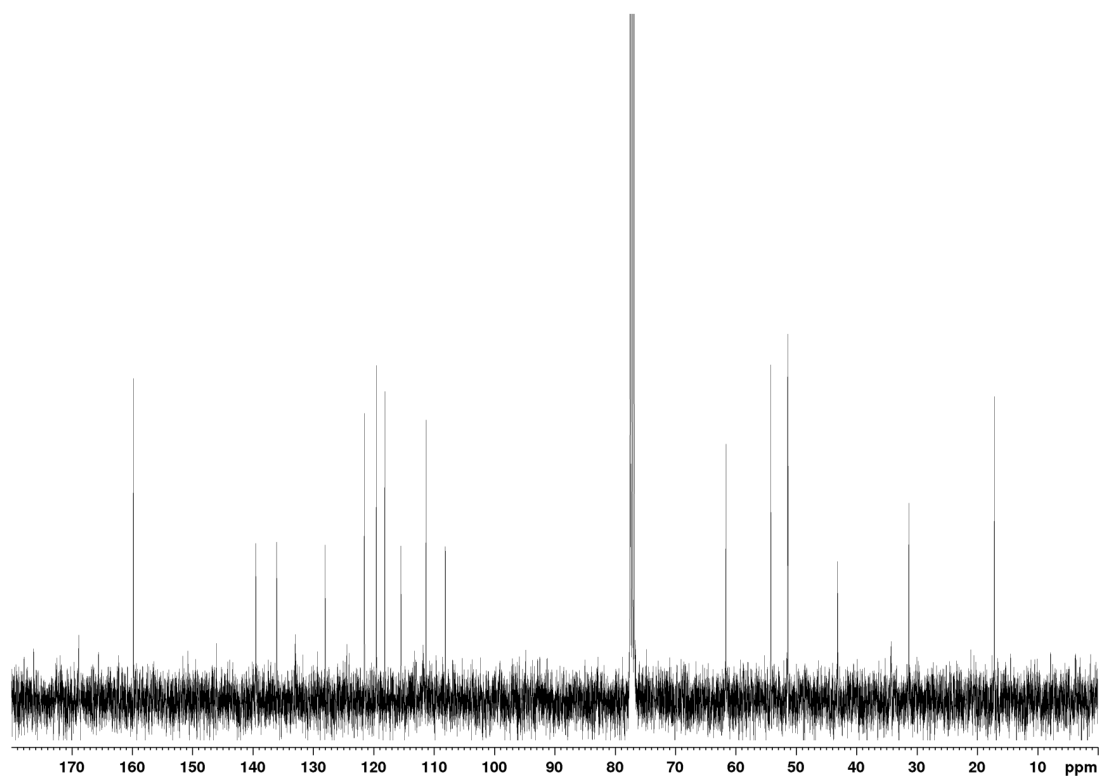

**Supplementary Figure 3d.**  $^{13}\text{C}$  NMR spectrum of isolated hirsuteine ( $\text{CDCl}_3$ , 298 K, 100 MHz). The compound was characterized by NMR when isolated for the first time. A compound with identical retention time, HRMS and MSMS was also obtained from a second batch of plant material.

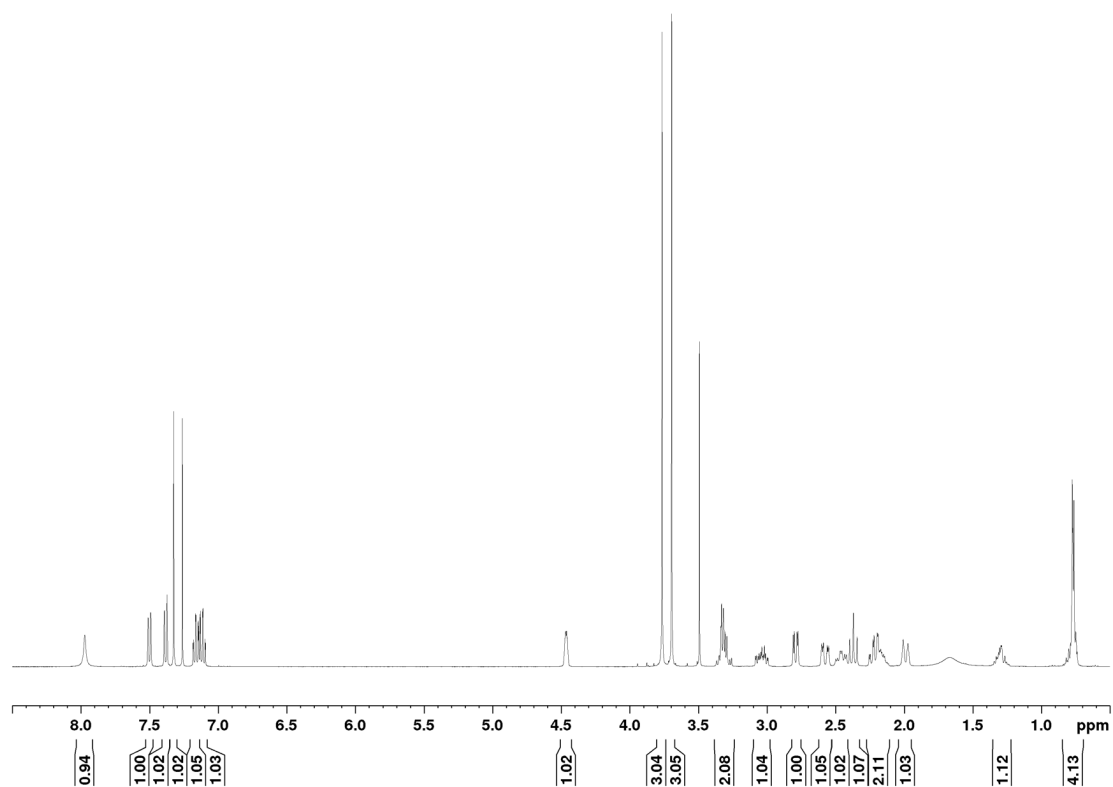

**Supplementary Figure 3e.**  $^1\text{H}$  NMR spectrum of isolated hirsutine ( $\text{CDCl}_3$ , 298 K, 400 MHz). The compound was characterized by NMR when isolated for the first time. A compound with identical retention time, HRMS and MSMS was also obtained from a second batch of plant material.

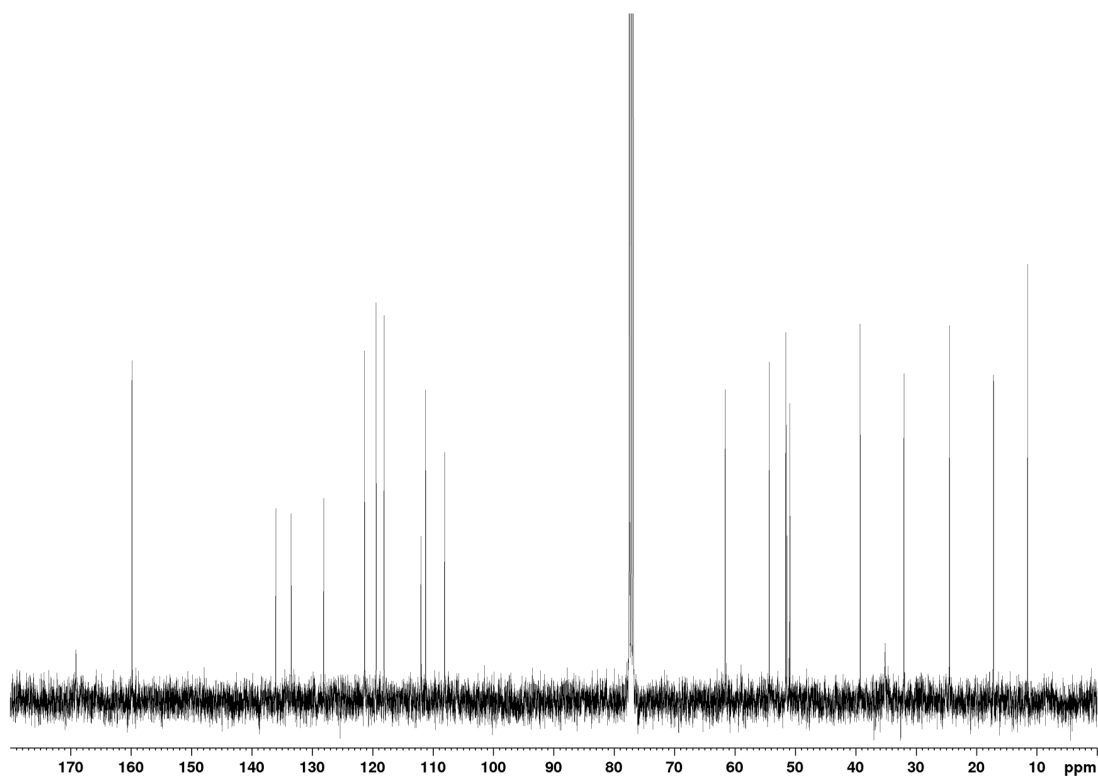

**Supplementary Figure 3f.**  $^{13}\text{C}$  NMR spectrum of isolated hirsutine ( $\text{CDCl}_3$ , 298 K, 100 MHz). The compound was characterized by NMR when isolated for the first time. A compound with identical retention time, HRMS and MSMS was also obtained from a second batch of plant material.

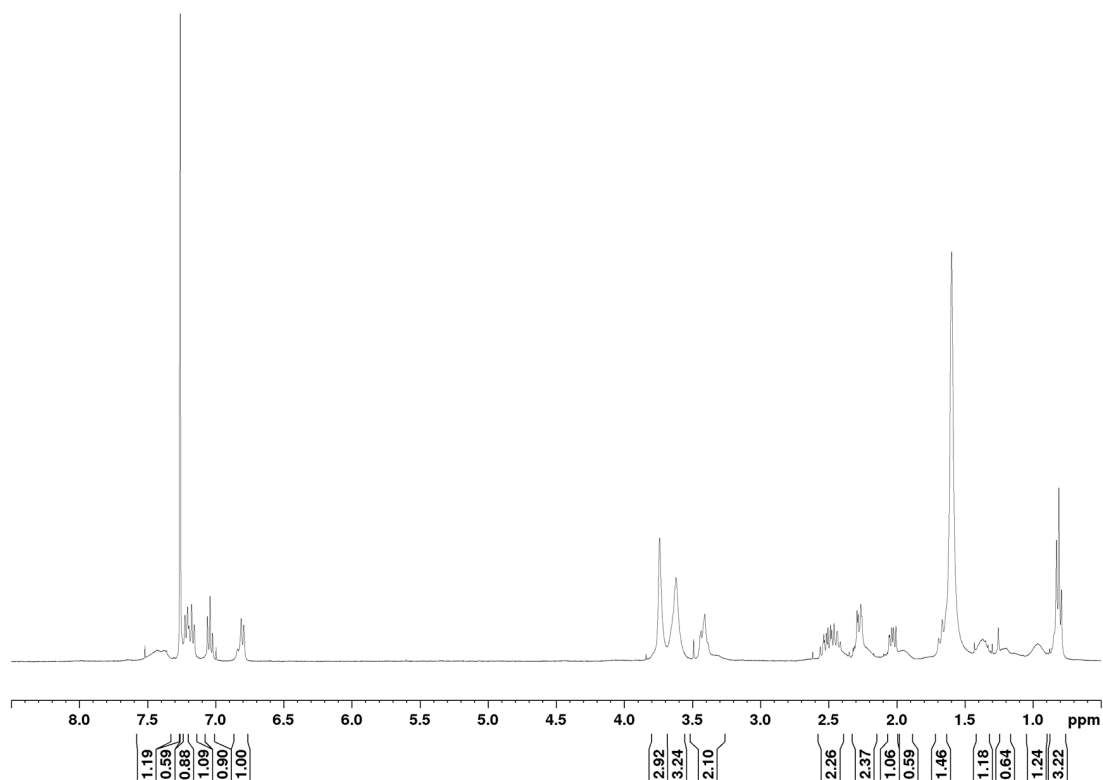

**Supplementary Figure 3g.**  $^1\text{H}$  NMR spectrum of isolated rhynchophylline ( $\text{CDCl}_3$ , 298 K, 400 MHz). The compound was characterized by NMR when isolated for the first time. A compound with identical retention time, HRMS and MSMS was also obtained from a second batch of plant material.

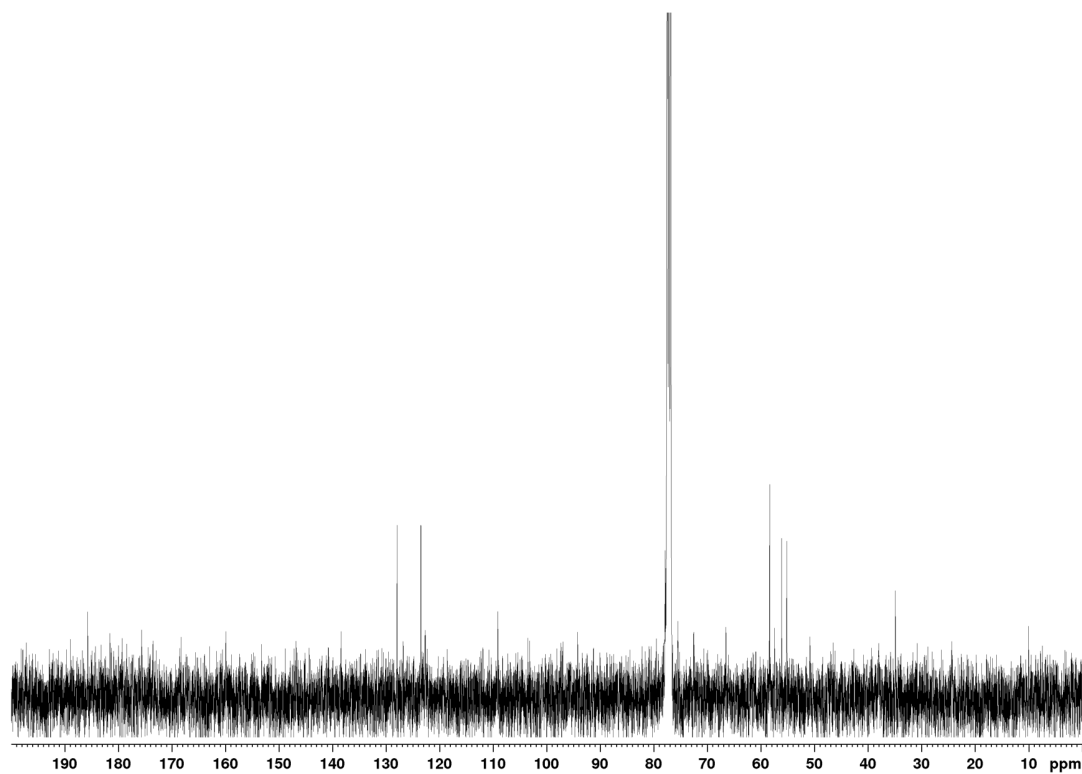

**Supplementary Figure 3h.**  $^{13}\text{C}$  NMR spectrum of isolated rhynchophylline ( $\text{CDCl}_3$ , 298 K, 100 MHz). The compound was characterized by NMR when isolated for the first time. A compound with identical retention time, HRMS and MSMS was also obtained from a second batch of plant material.

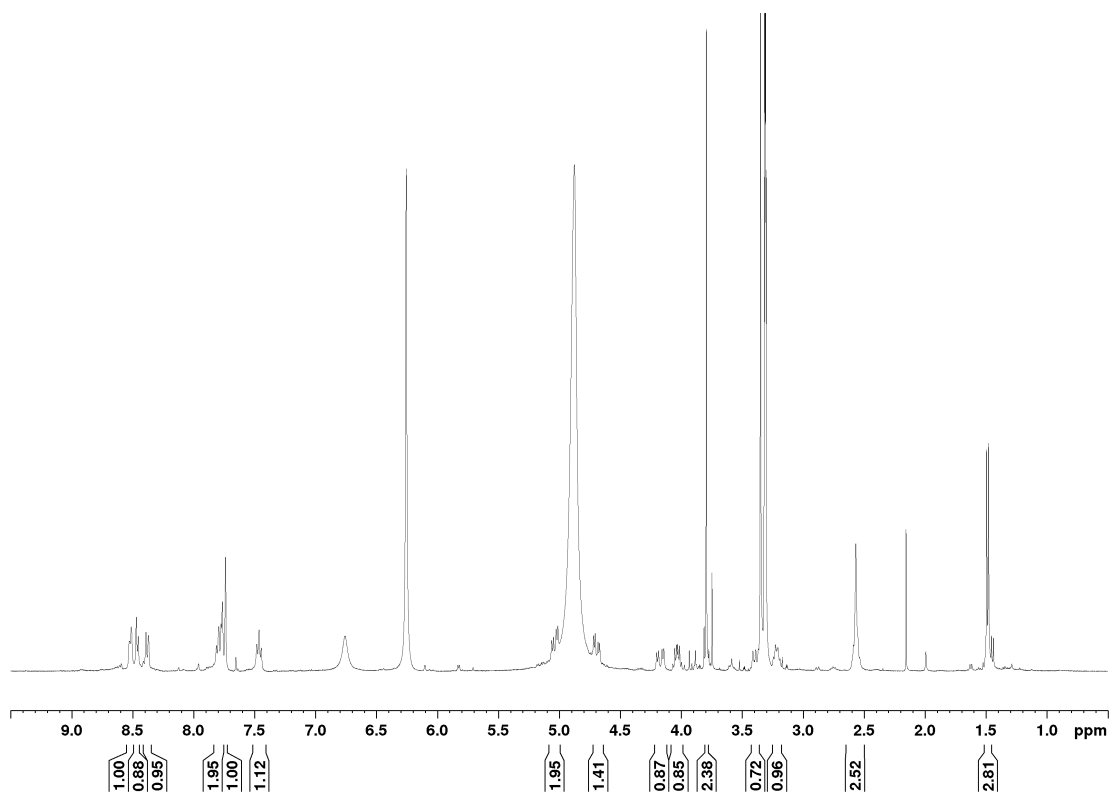

**Supplementary Figure 3i.** <sup>1</sup>H NMR spectrum of synthetic alstonine (CDCl<sub>3</sub>, 298 K, 400 MHz). The compound was synthesized according to literature. NMR data was in agreement with reported data (see Supplementary Table 2).



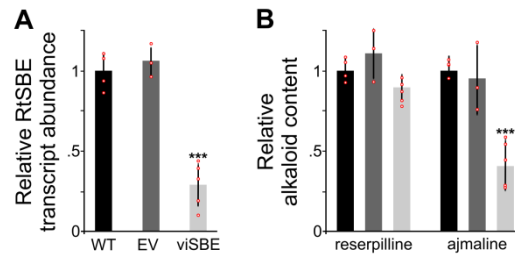

**Supplementary Figure 4. Silencing of the *Rauwolfia tetraphylla* ortholog of SBE led to a specific decrease of the ajmaline content.** Relative expression of SBE (A) and relative amount of reserpiline and ajmaline (B) in leaves of *R. tetraphylla* wild type plants (WT, black bars), plants transformed with pTRV2- empty vector (EV, dark grey bars) and plants transformed with pTRV2-R<sub>t</sub>SBE (viSBE, light grey). Each red dot represents a datapoint that is the mean of three technical replicates of one plant. Thus, red dots indicate individual average gene expression, reserpiline or ajmaline content. The silencing experiment was performed on four WT, three EV and five viSBE plants, with error bars indicating the mean  $\pm$  SE for these biological (individual plant) replicates. Asterisks denote statistical significance (\*\*\* $P < 0.001$ , Two-sided Student's t-test, gene expression  $P=3.02 \times 10^{-5}$ ; ajmaline  $P=3.15 \times 10^{-4}$ ). Experiment was repeated in duplicate.

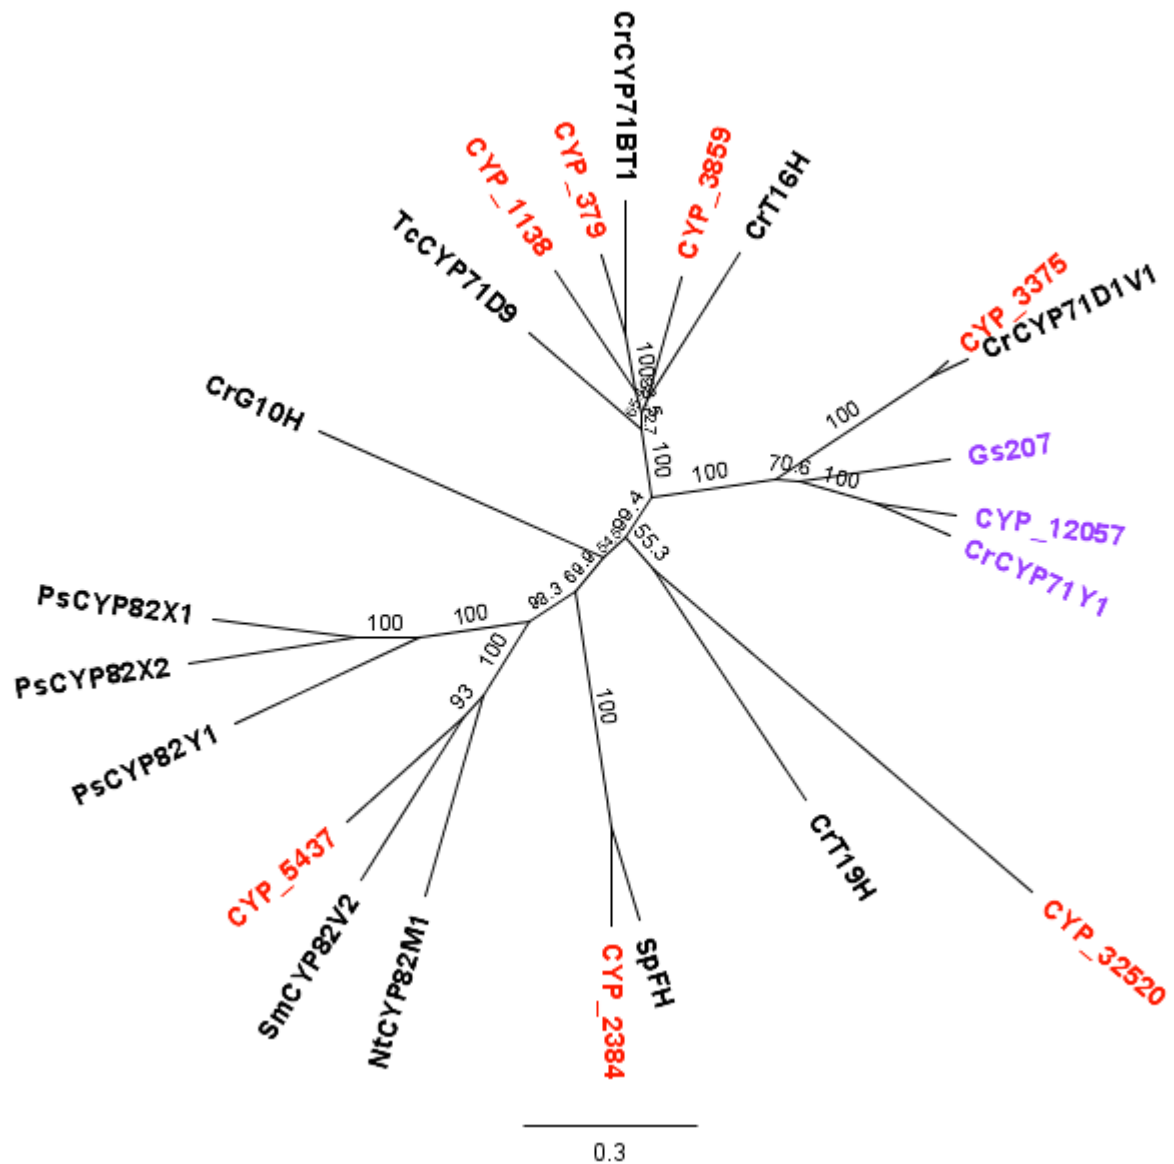

**Supplementary Figure 5.** Unrooted neighbour-joining phylogenetic tree for CYP candidates from this study (red and purple) and previously reported CYPs from other organisms. Active sarpagan bridge enzymes are shown in purple. Bootstrap frequencies for each clade were based on 1000 iterations. Phylogenetic tree was built using the Geneious Tree Builder program in the Geneious software package (Geneious 8.1.8, Biomatters).

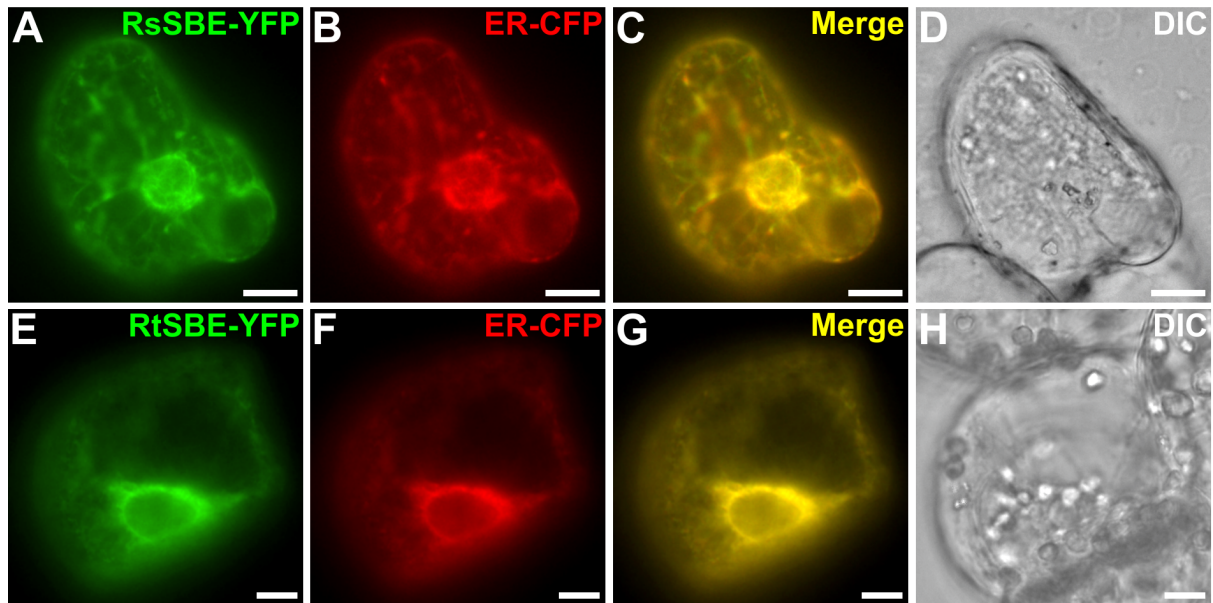

**Supplementary Figure 6.** Subcellular localization of SBE (*R. serpentina*, Rs; *R. tetraphylla*, Rt). (A-D) Subcellular localization of RsSBE YFP fusion protein in *C. roseus* cells. Cells were transiently co-transformed with plasmids expressing RsSBE-YFP (A), RtSBE (E) or an endoplasmic reticulum CFP marker (ER-CFP, B, F). Colocalization of the fluorescence signals appears in yellow when merging the two individual (green/red) false color images (C, G). Cell morphology is observed with differential interference contrast (DIC) (D, H). Bars, 10  $\mu$ m. Transformation was repeated three times and for each more than 100 transformed cells were observed.

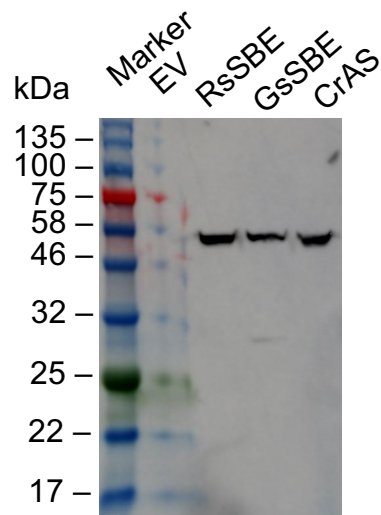

**Supplementary Figure 7.** Western blot showing the expression of RsSBE, GsSBE and CrAS (A) in *Saccharomyces cerevisiae* harbouring pESC-Leu2d::CPR (EV) and pESC-Leu2d::CYP/CPR. Protein expression was induced by adding galactose. Recombinant P450 proteins were detected using  $\alpha$ -FLAG antibodies. Experiment were repeated two times independently with similar results.

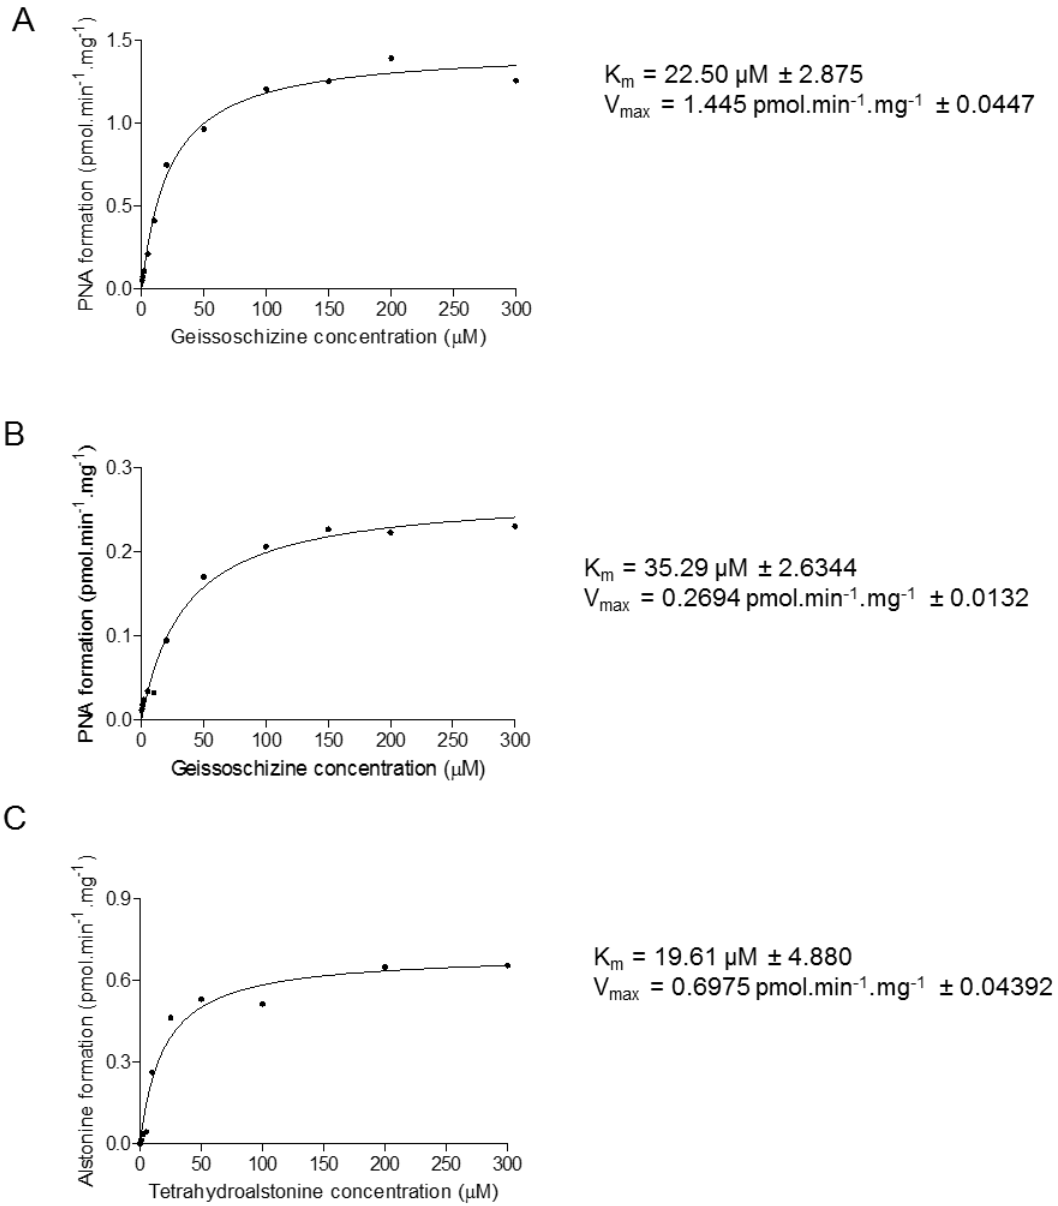

**Supplementary Figure 8.** Steady-state enzyme kinetics of identified enzymes in total microsomal protein extracts of *S. cerevisiae*. A. RsSBE with geissoschizine. B. GsSBE with geissoschizine. C. CrAS with tetrahydroalstonine. Data represent mean of three technical replicates.

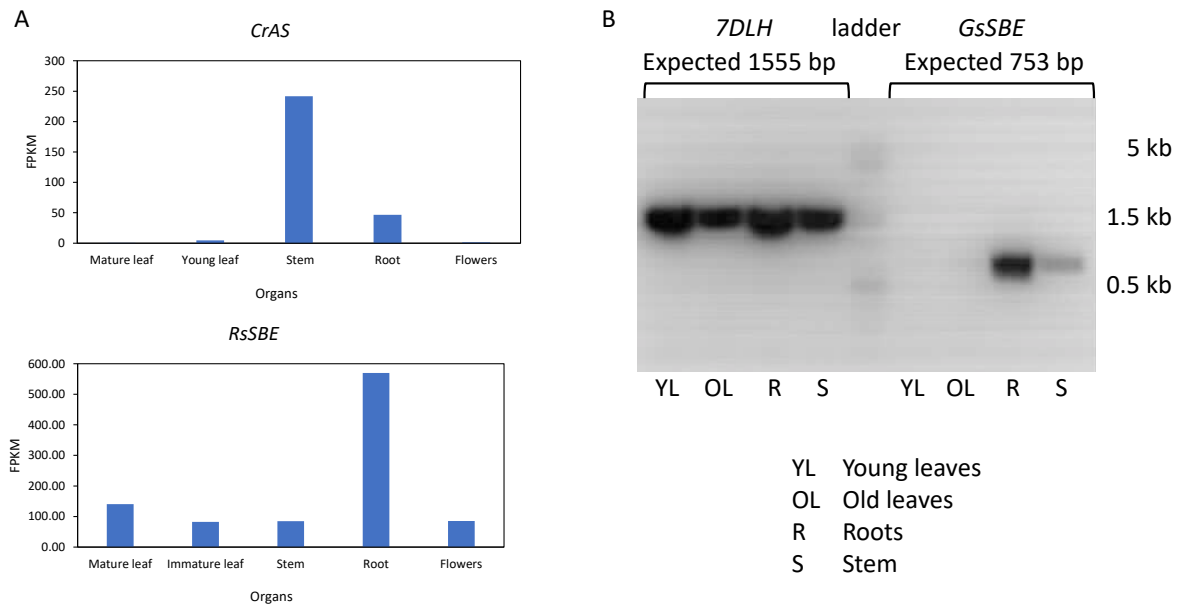

**Supplementary Figure 9.** Relative expression of *RsSBE*, *GsSBE* and *CrAS* in different organs. A. FPKM values of *CrAS* and *RsSBE* obtained from RNA-seq data (previously made available at <http://medicinalplantgenomics.msu.edu/> as reported in reference 9). B. RT-PCR of *GsSBE* in comparison to *7DLH* positive control. This experiment was not repeated, but is consistent with recently released RNA-seq data for *Gelsimium sempervirens* (reported in reference 11).

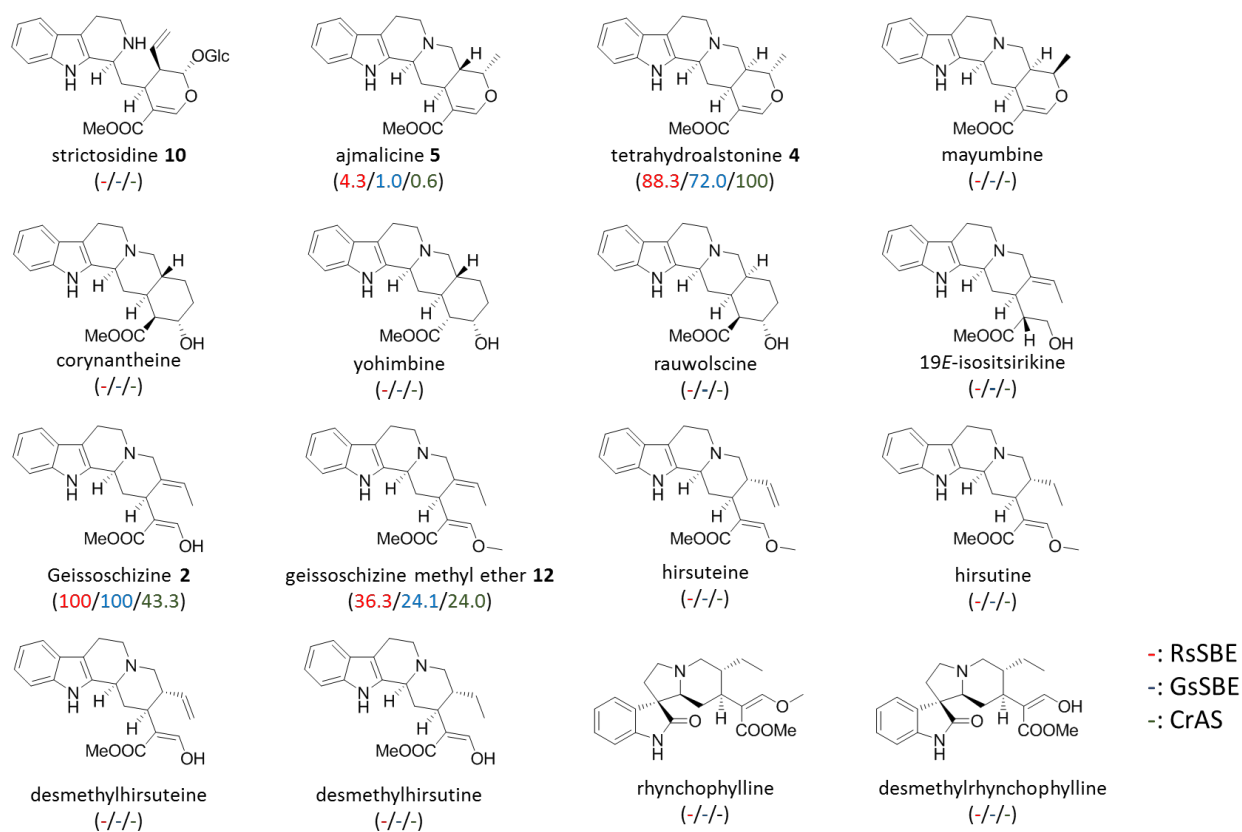

**Supplementary Figure 10.** Substrate specificity of RsSBE, GsSBE and CrAS. Substrates originate from different subgroups of MIA, including heteroyohimbanes (ajmalicine, tetrahydroalstonine, mayumbine, geissoschizine), yohimbanes (corynantheine, yohimbine, rauwolscine, isositsirikine), methyl ether alkaloids (geissoschizine methyl ether, hirsuteine, hirsutine and rhynchophylline) and their unmethylated semisynthetic derivatives (desmethyhlirsuteine, desmethyhlirsutine and desmethyhlrhynchophylline). Colors refer to the enzyme: red, **RsSBE**; blue, **GsSBE**; green, **CrAS**. Numbers indicate relative conversion of the substrate compared to the conversion of geissoschizine in case of RsSBE/GsSBE, or compared to tetrahydroalstonine in case of CrAS. “-” means no conversion.

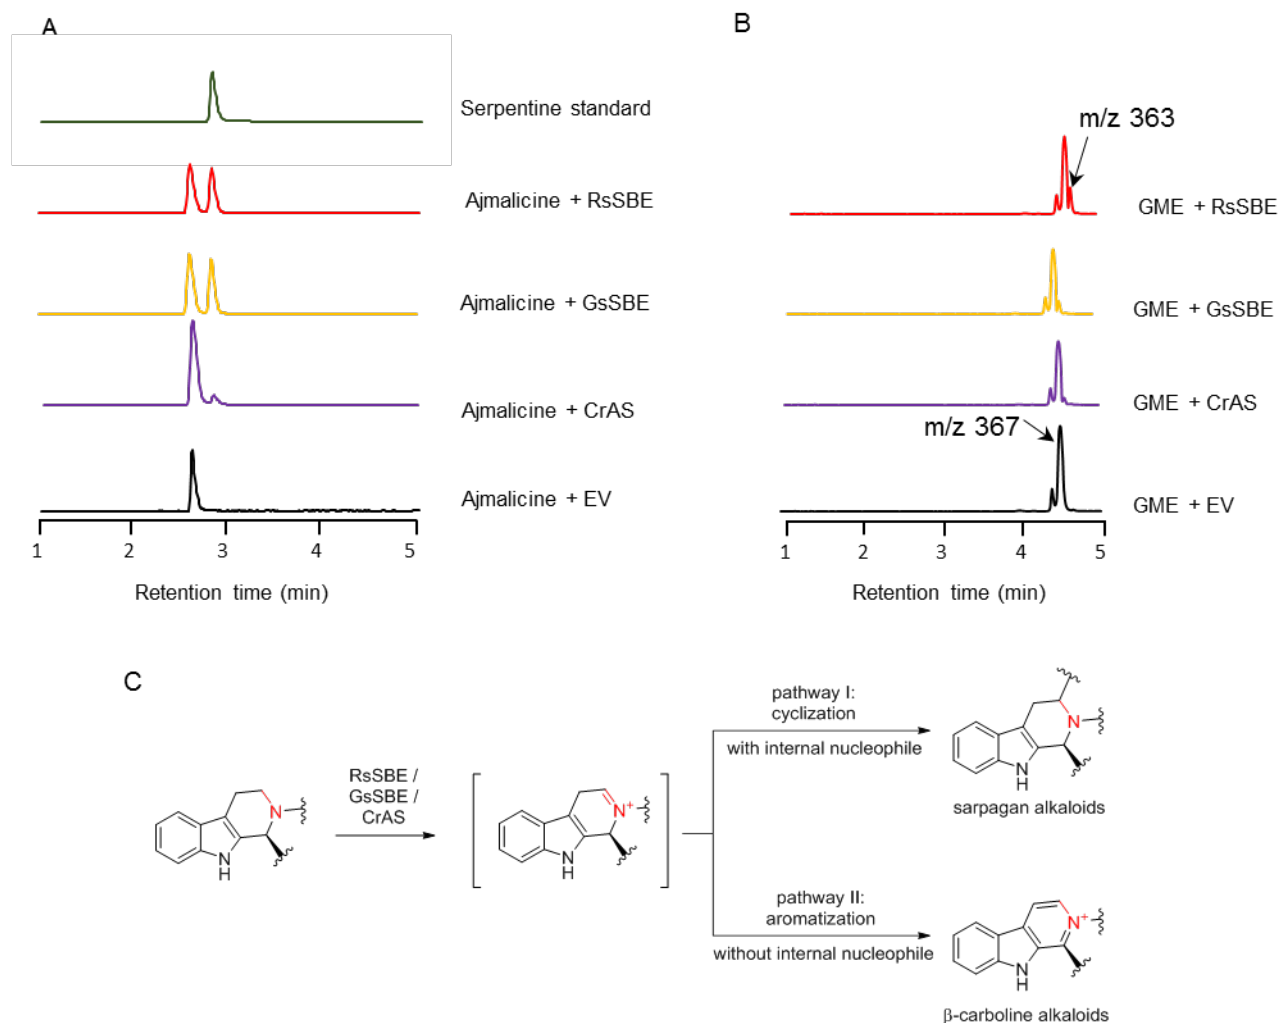

**Supplementary Figure 11.** Catalytic activity of recombinant RsSBE, GsSBE and CrAS with additional substrates. Extracted ion chromatograms showing the catalytic activity of RsSBE (Rs\_CYP12057), GsSBE (GsSBE) and CrAS (CrCYP71AY1). The negative control is empty vector (EV). RsSBE, GsSBE and CrAS oxidized ajmalicine to form serpentine and geissoschizine to form a compound with a mass and UV spectrum consistent with oxidized geissoschizine methyl ether. Whole cell yeast cultures expressing the corresponding proteins were fed with the indicated substrate (10  $\mu$ M) for 24 hours. **A.** Ajmalicine as substrate. **B.** Geissoschizine methyl ether (GME) as substrate. **C.** Unifying mechanism for the action of SBE and its *C. roseus* homologue AS with substrate with (pathway I) or without (pathway II) internal nucleophile. All experiments were repeated three times independently with similar results.



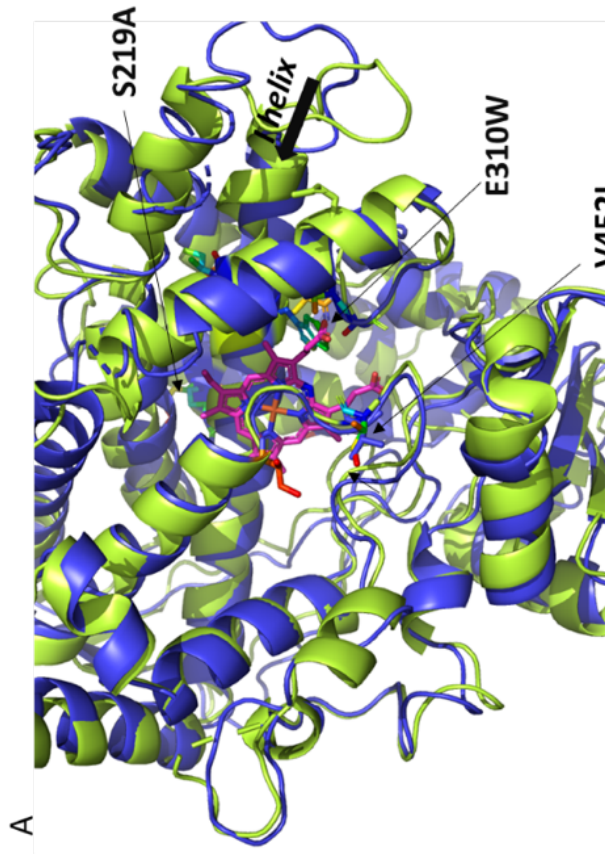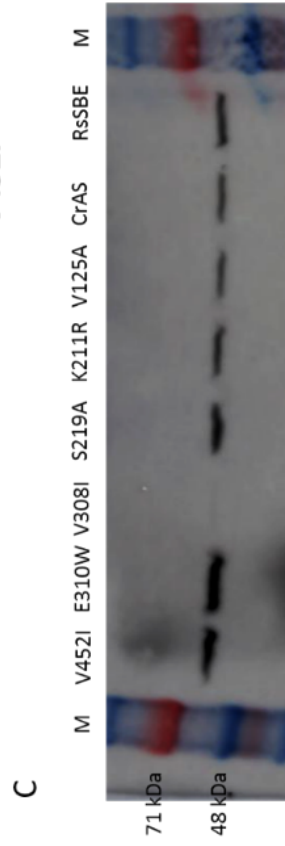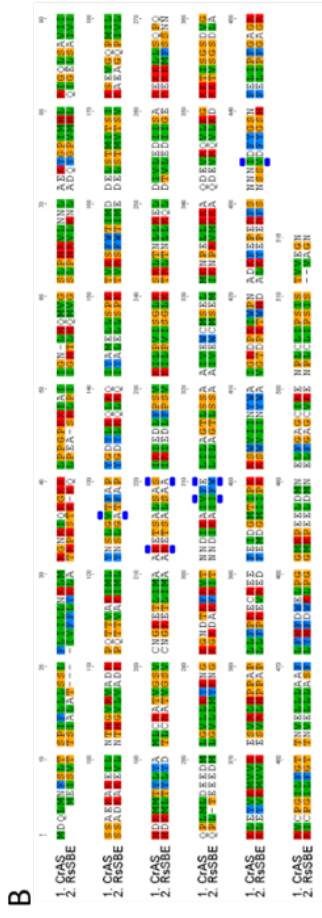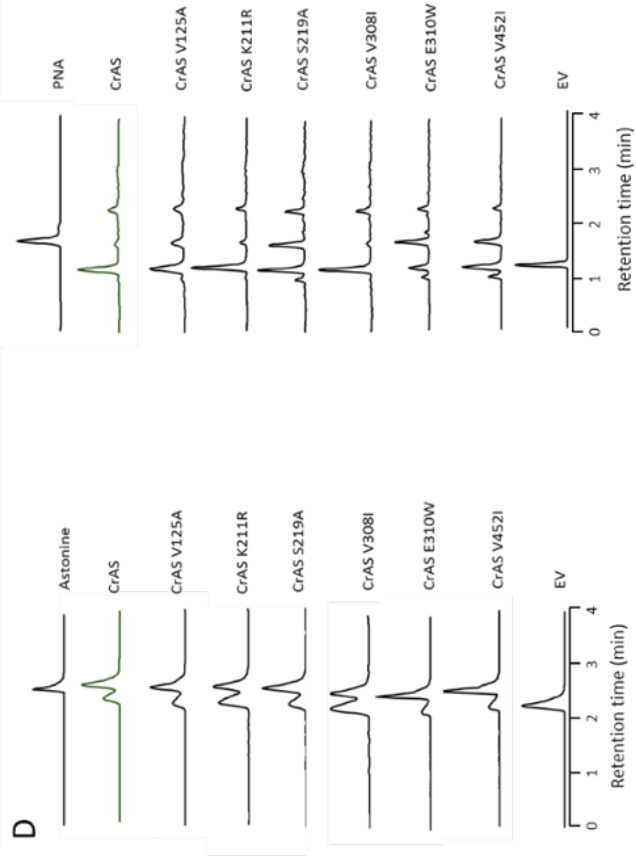

**Supplementary Figure 12.** Homology modeling and mutagenesis of CrAS. **A.** RsSBE and CrAS protein structure homology modeling using Phyre2, heme is highlighted in pink. **B.** Sequence alignment of CrAS and Rs SBE. Blue squares indicate mutations made in this study. **C.** Western blot showing expression of mutants. Protein expression was induced by adding galactose. Recombinant P450 proteins were detected using  $\alpha$ -FLAG antibodies. This experiment was repeated two times independently with similar results. **D.** LC-MS chromatograms of assays with CrAS mutants with tetrahydroalstonine (left) and geissoschizine (right). This experiment was repeated three times independently with similar results.

## Supplementary Tables

**Supplementary Table 1.** Primers used for the assembly of expression vectors, creating mutants and for RT-PCR

| Vector name            | Forward primer (5'-3')                                                        | Reverse primer (5'-3')                                                   | Insert size (bp) |
|------------------------|-------------------------------------------------------------------------------|--------------------------------------------------------------------------|------------------|
| pESC-Leu2d-5437        | ACC CTC ACT AAA GGG CGG<br>CCG CAA CCA TGG ACT TAT<br>TAC AAA TCT TA TT       | GTC ATC CTT GTA ATC<br>CAT CGA TAC AGG TTC<br>ATA CAA GCA CTT GG CA      | 1575             |
| pESC-Leu2d-379         | ACC CTC ACT AAA GGG CGG<br>CCG CAA CCA TGA TGG AGC<br>TCA TCG TTC TCC TTT TTG | GTC ATC CTT GTA ATC<br>CAT CGA TAC TTC CCC<br>TTT GTA ATC AAC ATG AG     | 1527             |
| pESC-Leu2d-3375        | ACC CTC ACT AAA GGG CGG<br>CCG CAA CCA TGA TGG AGT<br>TCT CTT TCT CCT TTC C   | GTC ATC CTT GTA ATC<br>CAT CGA TAC TTT TGC<br>AAG ATG AGG AAC CAG<br>TTT | 1503             |
| pESC-Leu2d-12057       | ACC CTC ACT AAA GGG CGG<br>CCG CAA CCA TGG AGA TAA<br>TGA ATT TCT CTC TCA AC  | GTC ATC CTT GTA ATC<br>CAT CGA TAC ATT TCC<br>TGC AAC GGA GAT GCT G      | 1580             |
| pESC-Leu2d-2384        | ACC CTC ACT AAA GGG CGG<br>CCG CAA CCA TGG CGT CTA<br>TCT GTC TCT ACT TTC     | GTC ATC CTT GTA ATC<br>CAT CGA TAC AAT CTG<br>AGC AAG TAG ATT GAG C      | 1536             |
| pESC-Leu2d-1138        | ACC CTC ACT AAA GGG CGG<br>CCG CAA CCA CCA TGG AGC<br>TCA TCT TTC TCT TCT     | GTC ATC CTT GTA ATC<br>CAT CGA TAC GCG ATC<br>TCT TTT TTC AGA GCA<br>GAA | 1503             |
| pESC-Leu2d-3859        | ACC CTC ACT AAA GGG CGG<br>CCG CAA CCA CCA TGG CAA<br>TCA AGA TTG C           | GTC ATC CTT GTA ATC<br>CAT CGA TAC GCC CAT<br>TTT GCA GAA GAA CAA<br>GCA | 1458             |
| pESC-Leu2d-32520       | ACC CTC ACT AAA GGG CGG<br>CCG CAA CCA CCT TGT TCA<br>TGA AGT CCA CCC TTG A   | GTC ATC CTT GTA ATC<br>CAT CGA TAC GCG CCT<br>GAA GAA TTT CTC CT         | 1566             |
| pESC-Leu2d-Gs_207-0.13 | ACC CTC ACT AAA GGG CGG<br>CCG CAA CCA TGC AGC TCT<br>CTT TCT CCT ATC CTG     | GTC ATC CTT GTA ATC<br>CAT CGA TAC TGG AAC<br>AAC AGT CTT GGG AA         | 1509             |
| pESC-Leu2d-Cr71AY1     | ACC CTC ACT AAA GGG CGG<br>CCG CAA CCA TGG ATC AGC<br>TGA TGA ACT TCT C       | GTC ATC CTT GTA ATC<br>CAT CGA TAC GTT TCC<br>TTC AAC TAC AGT T          | 1464             |
| 7DLH-RT                | ATG GGA GTA AAC TTC AAG<br>TGG T                                              | GTT TGT GCA AAA TTA<br>AGT GAG CAC                                       | 1555             |
| GsSBE-RT               | CGA ACT GCC CCA TCA CAC                                                       | AAG ATC AAT TGC AAA<br>ACG ATG GC                                        | 753              |
| CrAS_V125A_            | ACC TAA ACT ATT ATA CAA<br>CAT GAT TTT AGC CAC AGT<br>AGT                     | ATG TTG TAT AAT AGT<br>TTA GGT GCC ACT TTT<br>GCT CCC TAT GGT GA         |                  |
| CrAS_K211R             | AGC TGC CAT AAT TAG AGT<br>CTC TCG TCC ATT A                                  | AGA CTC TAA TTA TGG<br>CAG CTA GAG AAA CGT<br>CAG CTC TTT CT             |                  |

|            |                                                |                                                                   |
|------------|------------------------------------------------|-------------------------------------------------------------------|
| CrAS_S219A | AGC AGA AAG AGC TGA CGT<br>TTC TTT AGC TGC CA  | AAA GAA ACG TCA GCT<br>CTT TCT GCT GCC ATT<br>AGG ATT GAA GAT     |
| CrAS_V308I | GGC CTT GAT GTC ATT GTT<br>GGT GAC TCT AAA TTT | AAC AAT GAC ATC AAG<br>GCC ATC ATT TTT GAA<br>CTG ATT TTG GCT GGA |
| CrAS_E310W | AAA AAC GAT GGC CTT GAT<br>GTC ATT GTT GGT G   | ATC AAG GCC ATC GTT<br>TTT TGG CTG ATT TTG<br>GCT GGA ACT         |
| CrAS_V452I | CCT TCT TCC AGC ACC AAA<br>TGG TAT CAA CTC     | TTT GGT GCT GGA AGA<br>AGG ATT TGT CCT GGA<br>ATA TTA TTT GGA AC  |

**Supplementary Table 2.**  $^1\text{H}$  NMR data of isolated and semisynthetic alkaloids used in this study.

|    | Geissoschizine methyl ether<br><b>12</b>                   |                                                            | Geissoschizine <b>2</b>                                    |                                                            | Hirsuteine                       |                                                           | Hirsutine                  |                                                           | Rhynchophylline                                     |                                                   | Alstonine <b>7</b>                           |                                                   |
|----|------------------------------------------------------------|------------------------------------------------------------|------------------------------------------------------------|------------------------------------------------------------|----------------------------------|-----------------------------------------------------------|----------------------------|-----------------------------------------------------------|-----------------------------------------------------|---------------------------------------------------|----------------------------------------------|---------------------------------------------------|
| No | Reference <sup>1</sup>                                     | $^1\text{H}$ (CDCl <sub>3</sub> , 298 K, 400 MHz)          | Reference <sup>1</sup>                                     | $^1\text{H}$ (CDCl <sub>3</sub> , 298 K, 400 MHz)          | Reference <sup>2</sup>           | $^1\text{H}$ (CDCl <sub>3</sub> , 298 K, 400 MHz)         | Reference <sup>2</sup>     | $^1\text{H}$ (CDCl <sub>3</sub> , 298 K, 400 MHz)         | Reference <sup>3</sup>                              | $^1\text{H}$ (CDCl <sub>3</sub> , 298 K, 400 MHz) | Reference <sup>4</sup>                       | $^1\text{H}$ (CD <sub>3</sub> OD, 298 K, 400 MHz) |
| 3  | 3.52 (dd, 11.3, 2.0)                                       | 3.55 (br d, 11.9)                                          | 3.85 (dd, 11.6, 6.2)                                       | 3.85 (dd, 11.3, 6.5)                                       | 4.49 (br s)                      | 4.50 (br s)                                               | 4.45 (d, 2.4)              | 4.46 (m)                                                  | 2.27 (br d, 11.4)                                   | 2.28 (m)                                          | -                                            | -                                                 |
| 5  | 3.07 (ddd, 11.1, 5.4, 3.2)<br>2.65 (ddd, 11.1, 9.6, 4.6)   | 3.08 (ddd, 11.1, 5.3, 3.0)<br>2.66 (ddd, 10.9, 9.8, 4.8)   | 3.21 (dd, 11.7, 5.4)<br>2.72 (ddd, 11.7, 11.7, 4.1)        | 3.22 (dd, 11.5, 5.3)<br>2.72 (ddd, 11.9, 11.9, 4.0)        | 3.32 (m)                         | 3.33 (m)                                                  | 3.32 (m)                   | 3.32 (m)                                                  | 3.40 (dd, 10.3, 8.2)<br>2.44 (dt, 10.3, 8.2)        | 3.40 (m)<br>2.46 (m)                              | 8.53 (d, 6.5)                                | 8.52 (d, 6.6)                                     |
| 6  | 2.98 (dddd, 15.0, 9.6, 5.4, 2.0)<br>2.73 (br d, 15.0)      | 2.99 (m)<br>2.74 (m)                                       | 3.07 (dddd, 15.6, 11.7, 5.4, 2.2)<br>2.82 (dd, 15.6, 4.1)  | 3.07 (m)<br>2.82 (br d, 15.7)                              | 3.04 (dd, 12.0, 3.6)<br>2.59 (m) | 3.05 (m)<br>2.60 (m)                                      | 3.02 (m)<br>2.59 (d, 11.4) | 3.04 (m)<br>2.58 (dddd, 15.9, 4.7, 1.6, 1.6)              | 2.52 (ddd, 12.8, 10.3, 8.2)<br>2.02 (dt, 12.8, 8.2) | 2.54 (m)<br>2.03 (m)                              | 8.47 (d, 6.5)                                | 8.46 (d, 6.4)                                     |
| 9  | 7.46 (dd, 7.8, 1.2)                                        | 7.47 (br d, 7.8)                                           | 7.48 (d, 8.0)                                              | 7.48 (d, 7.8)                                              | 7.52 (d, 8.4)                    | 7.50 (d, 7.8)                                             | 7.52 (d, 7.8)              | 7.50 (d, 7.7)                                             | 7.20 (d, 7.3)                                       | 7.22 (d, 7.5)                                     | 8.39 (dt, 8.1, 1.1)                          | 8.38 (d, 8.4)                                     |
| 10 | 7.07 (td, 7.8, 1.2)                                        | 7.08 (ddd, 7.4, 7.4, 1.2)                                  | 7.11 (td, 8.0, 1.1)                                        | 7.11 (ddd, 8.0, 7.0, 1.1)                                  | 7.14 (t, 7.2)                    | 7.12 (ddd, 8.3, 7.2, 1.1)                                 | 7.13 (t, 7.8)              | 7.11 (ddd, 8.0, 7.2, 1.2)                                 | 7.03 (td, 7.7, 0.9)                                 | 7.04 (dd, 7.5, 7.5)                               | 7.47 (ddd, 8.1, 6.8, 1.2)                    | 7.46 (dd, 7.4, 7.4)                               |
| 11 | 7.11 (td, 7.8, 1.2)                                        | 7.12 (7.5, 7.5, 1.3)                                       | 7.16 (td, 8.0, 1.1)                                        | 7.18 (ddd, 8.1, 7.0, 1.3)                                  | 7.21 (t, 7.2)                    | 7.18 (ddd, 8.3, 7.1, 1.3)                                 | 7.18 (t, 7.8)              | 7.16 (ddd, 8.1, 7.1, 1.3)                                 | 7.17 (td, 7.7, 1.0)                                 | 7.18 (dd, 7.6, 7.6)                               | 7.83-7.75, m, 2H                             | 7.79 (dd, 7.6, 7.6)                               |
| 12 | 7.26 (dd, 7.8, 1.2)                                        | 7.27 (ddd, 8.1, 0.9, 0.9)                                  | 7.31 (d, 8.0)                                              | 7.32 (d, 8.0)                                              | 7.43 (d, 7.2)                    | 7.39 (d, 7.9)                                             | 7.42 (d, 7.8)              | 7.39 (d, 7.9)                                             | 6.59 (d, 7.6)                                       | 6.80 (d, 7.7)                                     | 7.83-7.75, m, 2H                             | 7.75 (m)                                          |
| 14 | 2.33 (ddd, 12.5, 12.5, 11.3)<br>1.89 (ddd, 12.5, 5.0, 2.0) | 2.35 (ddd, 12.5, 12.5, 11.9)<br>1.90 (ddd, 12.5, 5.0, 2.8) | 2.65 (ddd, 13.7, 11.3, 6.2)<br>2.10 (ddd, 13.7, 11.6, 1.5) | 2.61 (ddd, 13.5, 11.3, 6.2)<br>2.11 (ddd, 13.6, 11.9, 1.9) | 2.48 (m)<br>2.02 (m)             | 2.50 (ddd, 13.1, 13.1, 5.2)<br>2.04 (ddd, 13.2, 2.8, 1.6) | 2.47 (m)<br>2.04 (m)       | 2.46 (ddd, 13.0, 13.0, 5.1)<br>1.99 (ddd, 13.7, 2.3, 2.3) | 2.00 (br)<br>1.20 (br)                              | 1.95 (br)<br>1.20 (br)                            | 4.18 (dd, 17.7, 6.3)<br>3.38 (dd, 17.7, 9.3) | 4.17 (dd, 17.8, 6.0)<br>3.38 (dd, 18.1, 9.6)      |
| 15 | 3.70 (d, 12.5)                                             | 3.72 (m)                                                   | 4.51 (dd, 11.3, 1.5)                                       | 4.49 (dd, 11.2, 1.3)                                       | n.r. <sup>a</sup>                | 2.38 (ddd, 13.9, 11.0, 2.9)                               | 2.22 (m)                   | 2.21 (m)                                                  | 2.23 (br)                                           | 2.23 (br)                                         | 3.22 (dtd, 9.2, 6.3, 1.1)                    | 3.22 (ddd, 8.5, 6.5, 6.5)                         |
| 17 | 7.35 (s)                                                   | 7.36 (s)                                                   | 7.85 (s)                                                   | 7.83 (s)                                                   | 7.29 (s)                         | 7.28 (s)                                                  | 7.33 (s)                   | 7.32 (s)                                                  | 7.25 (s)                                            | 7.26 (s)                                          | 7.75 (s)                                     | 7.74 (s)                                          |
| 18 | 1.55 (dt, 7.2, 1.4)                                        | 1.56 (ddd, 7.2, 1.3, 1.3)                                  | 1.82 (dd, 6.9, 1.7)                                        | 1.83 (ddd, 6.8, 2.4, 0.7)                                  | 5.00 (d, 16.8)<br>4.95 (d, 10.2) | 4.93 (ddd, 17.2, 2.1, 0.8)<br>4.85 (dd, 10.3, 2.1)        | 0.77 (t, 7.2)              | 0.77 (m)                                                  | 0.82 (t, 7.4)                                       | 0.81 (t, 7.4)                                     | 1.49 (d, 6.2)                                | 1.49 (d, 6.3)                                     |
| 19 | 5.42 (br q, 7.2)                                           | 5.43 (br q, 7.2)                                           | 5.41 (br q, 6.9)                                           | 5.41 (br q, 6.8)                                           | 5.33 (dd, 10.8, 7.8)             | 5.36 (ddd, 17.2, 10.2, 8.5)                               | 1.34 (m)<br>0.83 (m)       | 1.31 (m)<br>0.77 (m)                                      | 1.37 (br)<br>0.96 (br)                              | 1.37 (br)<br>0.96 (br)                            | 2.57 (dq, 9.6, 5.8)                          | 2.56 (m)                                          |

|       |                                        |                                     |                                        |                                              |          |                                  |                   |                                               |                                        |                      |                                              |                                              |
|-------|----------------------------------------|-------------------------------------|----------------------------------------|----------------------------------------------|----------|----------------------------------|-------------------|-----------------------------------------------|----------------------------------------|----------------------|----------------------------------------------|----------------------------------------------|
| 20    | -                                      | -                                   | -                                      | -                                            | 2.99 (m) | 2.99 (m)                         | n.r. <sup>a</sup> | 2.19 (m)                                      | 2.28 (br dd, 11.4, 3.3)                | 2.27 (m)             | 4.03 (dq, 9.7, 6.2)                          | 4.03 (dddd, 9.5, 6.3, 6.3, 6.3)              |
| 21    | 3.44 (d, 12.5)<br>3.16 (dd, 12.5, 1.0) | 3.44 (d, 12.3)<br>3.17 (br d, 12.1) | 3.96 (dt, 13.4, 2.4)<br>3.18 (d, 13.4) | 3.95 (ddd, 13.7, 2.3, 2.3)<br>3.18 (d, 13.7) | 2.67 (m) | 2.68 (dd, 11.2, 4.4)<br>2.59 (m) | 2.82 (m)          | 2.79 (dd, 11.0, 3.4)<br>2.37 (dd, 10.7, 10.7) | 3.42 (dd, 10.6, 3.3)<br>1.66 (t, 10.6) | 3.45 (m)<br>1.67 (m) | 5.04 (dd, 14.4, 5.9)<br>4.70 (dd, 14.5, 5.2) | 5.04 (dd, 14.3, 6.0)<br>4.69 (dd, 14.5, 5.2) |
| OMe   | 3.82 (s)                               | 3.83 (s)                            | -                                      | -                                            | 3.79 (s) | 3.76 (s)                         | 3.78 (s)          | 3.76 (s)                                      | 3.71 (s)                               | 3.74 (s)             | -                                            | -                                            |
| COOMe | 3.72 (s)                               | 3.72 (s)                            | 3.69 (s)                               | 3.67 (s)                                     | 3.65 (s) | 3.68 (s)                         | 3.69 (s)          | 3.69 (s)                                      | 3.61 (s)                               | 3.62 (br s)          | 3.80 (s)                                     | 3.79 (s)                                     |
| NH    | 7.79 (br s)                            | 7.69 (br s)                         | 7.97 (br s)                            | 7.68 (br s)                                  | 8.32 (s) | 7.98 (br s)                      | n.r. <sup>a</sup> | 7.97 (br s)                                   | 8.52 (br s)                            | 7.42 (br s)          | -                                            | -                                            |

<sup>a</sup> not reported

**Supplementary Table 3.** <sup>13</sup>C NMR data of major isolated alkaloids used in this study.

| No | Hirsuteine               |                                                      | Hirsutine                |                                                      | Rhynchophylline          |                                                      |
|----|--------------------------|------------------------------------------------------|--------------------------|------------------------------------------------------|--------------------------|------------------------------------------------------|
|    | Reference <sup>[5]</sup> | <sup>13</sup> C (CDCl <sub>3</sub> , 298 K, 100 MHz) | Reference <sup>[6]</sup> | <sup>13</sup> C (CDCl <sub>3</sub> , 298 K, 100 MHz) | Reference <sup>[8]</sup> | <sup>13</sup> C (CDCl <sub>3</sub> , 298 K, 100 MHz) |
| 2  | 132.7                    | 133.0                                                | 133.1                    | 133.5                                                | 181.6                    | n.d. <sup>a</sup>                                    |
| 3  | 54.1                     | 54.2                                                 | 54.2                     | 54.3                                                 | 75.3                     | 75.3                                                 |
| 5  | 51.2                     | 51.3                                                 | 51.4                     | 51.6                                                 | 55.0                     | 55.0                                                 |
| 6  | 17.0                     | 17.1                                                 | 17.0                     | 17.2                                                 | 34.8                     | 34.7                                                 |
| 7  | 107..8                   | 108.1                                                | 107.8                    | 108.1                                                | 55.1                     | n.d. <sup>a</sup>                                    |
| 8  | 127.8                    | 128.1                                                | 127.9                    | 128.1                                                | 133.9                    | 133.8                                                |
| 9  | 117.9                    | 118.2                                                | 118.0                    | 118.1                                                | 123.1                    | 123.3                                                |
| 10 | 119.3                    | 119.6                                                | 119.3                    | 119.4                                                | 122.4                    | 122.5                                                |
| 11 | 121.3                    | 121.5                                                | 121.3                    | 121.4                                                | 127.7                    | 127.7                                                |
| 12 | 111.2                    | 111.3                                                | 111.2                    | 111.2                                                | 109.4                    | 109.0                                                |
| 13 | 136.0                    | 136.1                                                | 135.9                    | 136.0                                                | 141.1                    | 140.9                                                |
| 14 | 31.1                     | 31.3                                                 | 31.7                     | 32.0                                                 | 29.0                     | 29.0                                                 |
| 15 | 34.0                     | 34.2                                                 | 34.9                     | 35.2                                                 | 37.9                     | 37.9                                                 |
| 16 | 111.6                    | 111.9                                                | 111.7                    | 112.0                                                | 111.9                    | 112.0                                                |
| 17 | 159.6                    | 159.7                                                | 159.8                    | 159.9                                                | 159.7                    | 159.4                                                |
| 18 | 115.4                    | 115.5                                                | 11.4                     | 11.5                                                 | 11.3                     | 11.2                                                 |
| 19 | 139.3                    | 139.5                                                | 24.3                     | 24.4                                                 | 24.2                     | 24.2                                                 |

|       |       |       |       |       |       |       |
|-------|-------|-------|-------|-------|-------|-------|
| 20    | 42.9  | 43.2  | 39.0  | 39.2  | 39.7  | 39.6  |
| 21    | 51.2  | 51.3  | 50.7  | 50.9  | 58.2  | 58.2  |
| OMe   | 61.4  | 61.6  | 61.5  | 61.6  | 61.4  | 61.5  |
| COOMe | 168.7 | 168.9 | 169.0 | 169.1 | 169.0 | 169.0 |
| COOMe | 51.2  | 51.4  | 51.3  | 51.4  | 51.1  | 51.1  |

<sup>a</sup> not detected by HMBC

## References

1. Takayama, H., Watanabe, T., Seki, H., Aimi, N. & Sakai, S. Geissoschizine revisited - definite proof of its stereostructure. *Tetrahedron Lett.* **33**, 6831–6834 (1992).
2. Zhang, Q., Lin, C., Duan, W., Wang, X. & Luo, A. Preparative Separation of Six Rhynchophylla Alkaloids from *Uncaria macrophylla* Wall by pH-Zone Refining Counter-Current Chromatography. *Molecules* **18**, 15490–15500 (2013).
3. Sakakibara, I. *et al.* Effect of oxindole alkaloids from the hooks of *Uncaria macrophylla* on thiopental-induced hypnosis. *Phytomedicine* **5**, 83–86 (1998).
4. Younai, A., Zeng, B., Meltzer, H. Y. & Scheidt, K. A. Enantioselective Syntheses of Heteroyohimbine Natural Products: A Unified Approach through Cooperative Catalysis. *Angew. Chem. Int. Ed. Engl.* **54**, 6900–4 (2015).
5. Kohda, H., Namera, A., Koyama, A., Yamasaki, K. & Tani, T. Indole Alkaloid Production in Callus Cultures of *Uncaria rhynchophylla* (MIQ) MIQUEL. *Chem. Pharm. Bull. (Tokyo)*. **44**, 352–357 (1996).
6. Villa, R. A., Xu, Q. & Kwon, O. Total Synthesis of (±)-Hirsutine: Application of Phosphine-Catalyzed Imine–Allene [4 + 2] Annulation. *Org. Lett.* **14**, 4634–4637 (2012).

**Supplementary Table 4.** Chromatographic and spectral data used for the identification and relative quantification of enzymatic products by LC-MS/MS.

| Compound               | found<br>[M] <sup>+</sup> or<br>[M+H] <sup>+</sup> | expected<br>[M] <sup>+</sup> or<br>[M+H] <sup>+</sup> | Retention<br>time (min) | Cone<br>voltage<br>(eV) | Collison<br>energy<br>(eV) | ESI-CID, <i>m/z</i> | Source of<br>reference<br>compound |
|------------------------|----------------------------------------------------|-------------------------------------------------------|-------------------------|-------------------------|----------------------------|---------------------|------------------------------------|
| Alstonine              | 349.1612                                           | 349.1547                                              | 2.84                    | 36                      | 50                         | 206.02              | Semi-synthetic                     |
|                        |                                                    |                                                       |                         |                         | 31                         | 234.96              |                                    |
|                        |                                                    |                                                       |                         |                         | 30                         | 263.06              |                                    |
|                        |                                                    |                                                       |                         |                         | 26                         | 317.10              |                                    |
| Polyneuridine aldehyde | 351.1707                                           | 351.1703                                              | 2.23                    | 26                      | 21                         | 158.2               | Gift                               |
|                        |                                                    |                                                       |                         |                         | 14                         | 166.0               |                                    |
|                        |                                                    |                                                       |                         |                         | 19                         | 319.0               |                                    |
|                        |                                                    |                                                       |                         |                         | 16                         | 323.0               |                                    |
| Ajmalicine             | 353.1942                                           | 353.1860                                              | 2.76                    | 50                      | 46                         | 117.2               | Commercial                         |
|                        |                                                    |                                                       |                         |                         | 26                         | 144.0               |                                    |
|                        |                                                    |                                                       |                         |                         | 20                         | 210.1               |                                    |
|                        |                                                    |                                                       |                         |                         | 20                         | 222.0               |                                    |
| Tetrahydroalstonine    | 353.1942                                           | 353.1860                                              | 2.76                    | 50                      | 40                         | 114.16              | Commercial                         |
|                        |                                                    |                                                       |                         |                         | 40                         | 117.19              |                                    |



|                                  |          |          |      |    |    |        |                |
|----------------------------------|----------|----------|------|----|----|--------|----------------|
| Serpentine                       | 349.1612 | 349.1547 | 2.86 | 54 | 54 | 205.88 | Commercial     |
|                                  |          |          |      |    | 24 | 234.95 |                |
|                                  |          |          |      |    | 30 | 262.98 |                |
|                                  |          |          |      |    | 24 | 317.12 |                |
| Geissoschizine                   | 353.1860 | 353.1860 | 1.77 | 50 | 40 | 114.16 | Semi-synthetic |
|                                  |          |          |      |    | 40 | 117.19 |                |
| Geissochizine methyl ether (GME) | 367.2035 | 367.2016 | 4.56 |    |    |        | Isolated       |
